# Supplementary material for: Compliance of Atrial Fibrillation Treatment with the Atrial Fibrillation Better Care (ABC) Pathway Improves the Clinical Outcomes in the Middle East Population: A Report from the Gulf Survey of Atrial Fibrillation Events (SAFE) Registry
Source: PubMed Central journal article supplement (PMC7287832; doi:10.3390/jcm9051286), 2020-04-29

## Supplementary materials

**Table s1. Anticoagulation management.**

|                               | <b>High stroke risk</b><br>n= 1490 (73.7%) | <b>Low stroke risk</b><br>n=531 (26.3%) |
|-------------------------------|--------------------------------------------|-----------------------------------------|
| No treatment                  | 91 (6.4%)                                  | 69 (13.1%)                              |
| Single antiplatelet therapy   | 403 (28.3%)                                | 197 (37.6%)                             |
| Dual antiplatelet therapy     | 97 (6.8%)                                  | 18 (3.4%)                               |
| Anticoagulant only            | 469 (33%)                                  | 207 (39.3%)                             |
| Dual antithrombotic therapy   | 294 (20.7%)                                | 28 (5.4%)                               |
| Triple antithrombotic therapy | 37 (2.6%)                                  | 4 (0.8%)                                |
| Other combinations            | 29 (2.2%)                                  | 2 (0.4%)                                |

High stroke risk: ☹️ CHA<sub>2</sub>DS<sub>2</sub>-VASc ≥2, ☹️ CHA<sub>2</sub>DS<sub>2</sub>-VASc ≥1

Low stroke risk: ☺️ CHA<sub>2</sub>DS<sub>2</sub>-VASc <2, ☺️ CHA<sub>2</sub>DS<sub>2</sub>-VASc

**Table s2. Management of comorbidities according to the current guidelines.**

|                                      | Hypertension<br>(n = 1029) | HF<br>(n = 524) | CAD<br>(n= 552) | Diabetes<br>mellitus<br>(n=603) | Dyslipidaemia<br>(n= 662) |
|--------------------------------------|----------------------------|-----------------|-----------------|---------------------------------|---------------------------|
| ACEI (%)                             | 462 (44.9%)                | 285 (54.4%)     | 274 (49.6%)     |                                 |                           |
| ARB (%)                              | 232 (22.5%)                | 95 (18.1%)      | 129 (23.4%)     |                                 |                           |
| Verapamil/diltiazem (%)              | 110 (10.7%)                |                 | 42 (7.6%)       |                                 |                           |
| Other Calcium Channel<br>blocker (%) | 144 (14%)                  |                 | 77 (13.9%)      |                                 |                           |
| Beta-blocker (%)                     | 624 (60.6%)                | 263 (50.2%)     | 332 (60.1%)     |                                 |                           |
| Digoxin (%)                          |                            | 331 (63,2%)     |                 |                                 |                           |
| Diuretic (%)                         | 552 (53.6%)                | 478 (91.2%)     |                 |                                 |                           |
| Aspirin (%)                          |                            |                 | 372 (67.4%)     |                                 |                           |
| Clopidogrel (%)                      |                            |                 | 125 (22.6%)     |                                 |                           |
| Statin (%)                           |                            |                 | 440 (79.7%)     |                                 | 559 (84.4%)               |
| Other lipid-lowering<br>agent (%)    |                            |                 | 12 (2.2%)       |                                 | 16 (2.4%)                 |
| Diet (%)                             |                            |                 |                 | 60 (10%)                        |                           |
| Insulin therapy (%)                  |                            |                 |                 | 162 (26.9%)                     |                           |
| Oral antidiabetic drugs<br>(%)       |                            |                 |                 | 409 (67.8%)                     |                           |

Abbreviations: ACEI-angiotensin-converting-enzyme inhibitors, ARB-angiotensin receptor blockers, CAD-coronary artery disease, HF-heart failure,

**Figure s1.**  
**Classification of patients included in the study according to the risk for stroke based on the CHA<sub>2</sub>DS<sub>2</sub>-VASc score.**

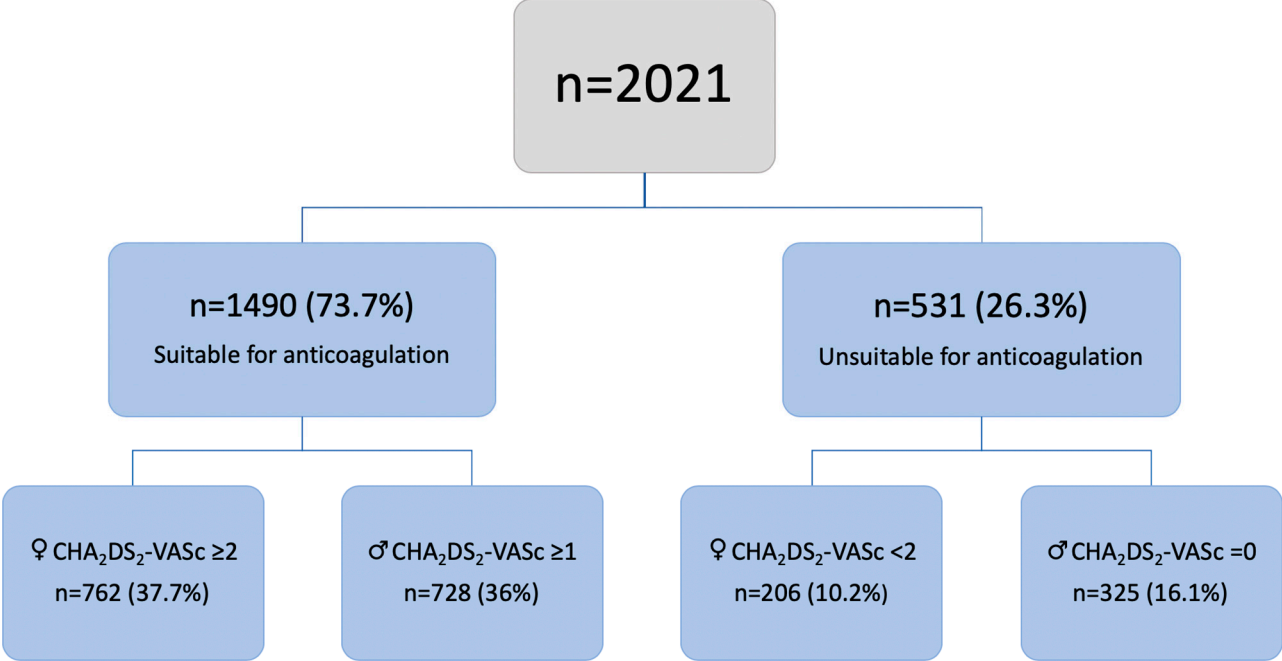

**Figure s2. A simplified methodology scheme of the evaluation of compliance of AF management with ABC pathway components.**

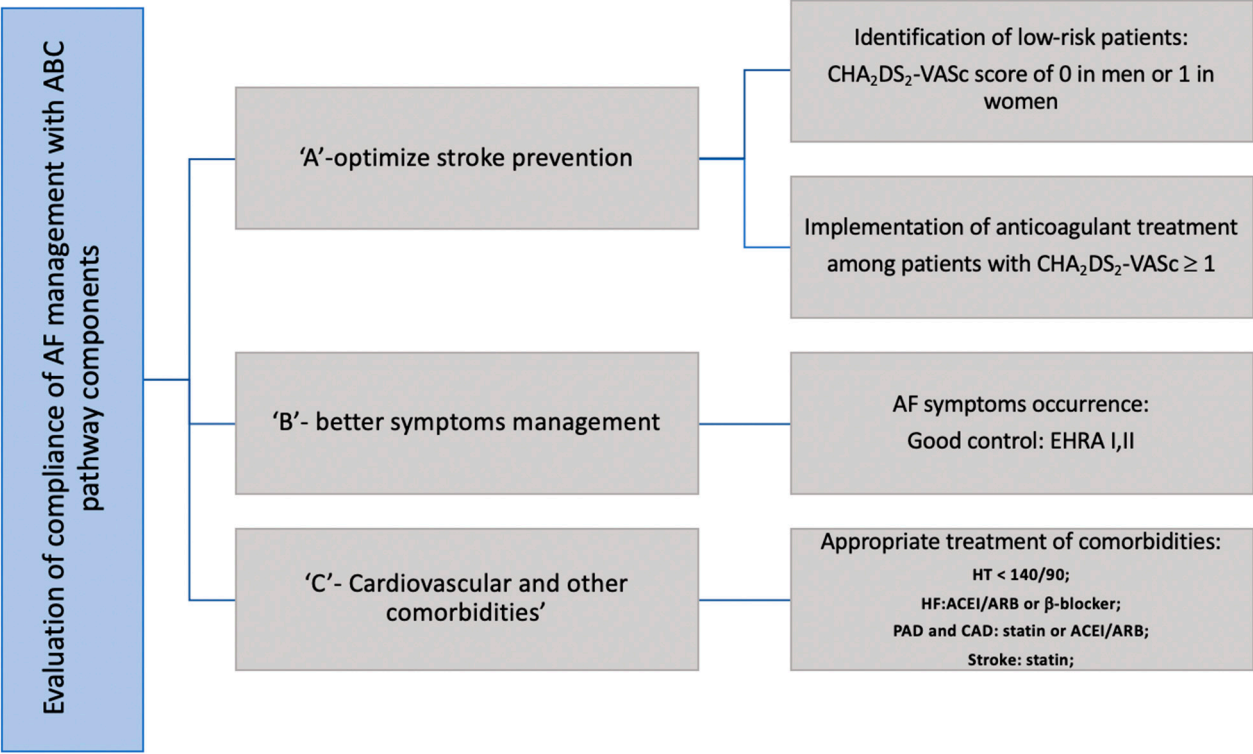

Supplement: jcm-09-01286-s001.pdf [file jcm-09-01286-s001.pdf]
